Version dated: April 19, 2018

RH: Characters correlation

## **Influence of different modes of morphological character correlation on phylogenetic tree inference**

THOMAS GUILLERME<sup>1,2,\*</sup>, AND MARTIN D. BRAZEAU<sup>2,3</sup>

<sup>1</sup>*School of Biological Sciences, University of Queensland, St. Lucia, Queensland, Australia.*

<sup>2</sup>*Imperial College London, Silwood Park Campus, Department of Life Sciences, Buckhurst Road, Ascot SL5 7PY, United Kingdom.*

<sup>3</sup>*Department of Earth Sciences, Natural History Museum, Cromwell Road, London, SW75BD, United Kingdom.*

**\*Corresponding author.** *guillert@tcd.ie*

## Abstract

Phylogenetic analysis algorithms require the assumption of character independence - a condition generally acknowledged to be violated by morphological data. Correlation between characters can originate from intra-organismal features, shared phylogenetic history or forced by particular character-state coding schemes. Although the two first sources can be investigated by biologists *a posteriori* and the third one can be avoided *a priori* with good practices, phylogenetic software do not distinguish between any of them.

In this study, we propose a new metric of raw character difference as a proxy for character correlation. Using thorough simulations, we test the effect of increasing or decreasing character differences on tree topology. Overall, we found an expected positive effect of reducing character correlations on recovering the correct topology. However, this effect is less important for matrices with a small number of taxa (25 in our simulations) where reducing character correlation is not more effective than randomly drawing characters. Furthermore, in bigger matrices (350 characters), there is a strong effect of the inference method with Bayesian trees being consistently less affected by character correlation than maximum parsimony trees.

These results suggest that ignoring the problem of character correlation or independence can often impact topology in phylogenetic analysis. However, encouragingly, they also suggest that, unless correlation is actively maximised or minimised, probabilistic methods can easily accommodate for a random correlation between characters.

(Keywords: Character difference, correlation, topology, Bayesian, maximum parsimony)

## INTRODUCTION

24

25       The last two decades have witnessed a “resurgence” of interest in the use of  
26 morphological character data in phylogenetic studies. This owes in large part to the use  
27 of fossils to undertake at least partial reconstructions of phylogenetic trees, especially  
28 where ancestral states reconstructions or absolute calibrations of divergence times are  
29 necessary. Morphological character data are often considered inferior to molecular  
30 sequence data, but are often the only source of phylogenetic data for extinct species.  
31 While there is a general appreciation of the limits of morphological data, they are  
32 frequently dismissed without any empirical investigations into their statistical  
33 properties. As morphological data are likely to continue to play an extensive role in  
34 phylogenetic analysis, it is essential to understand the circumstances under which  
35 morphological data might be expected to “misbehave”. This opens up possibilities for  
36 predicting problematic datasets and possibly proposing new confidence measures in  
37 phylogenetic datasets.

38       The non-independence of large numbers of morphological characters is often  
39 cited in anticipation of problems with morphological data. The assumption of character  
40 independence is central to phylogenetic inference methods such as maximum  
41 likelihood and maximum parsimony (e.g. Joysey and Friday, 1982; Felsenstein, 1985;  
42 Lewis, 2001; Felsenstein, 2004). Especially for discrete morphological data, this  
43 assumption of independence is probably violated frequently due to the very nature of  
44 phylogenetic data: correlations are expected to occur (to some degree) when characters

45 are depending on each other. Before discussing character correlation further, it is  
46 important to understand that it may manifest itself in at least three distinct ways:

47 • **Intra-organismal dependence:** this is the result of an intrinsic biological link  
48 between two characters through development, pleiotropy, and/or biological  
49 function. For example the lower and upper molar characters in mammals  
50 generally occlude one another. Therefore, one character describing a feature of a  
51 lower molar will be expected to be complemented by the surface of the occluding  
52 upper molar. Characters of the occlusal surface of two opposing molars will be  
53 expected to directly covary. Pleiotropy also results in covariation between  
54 different aspects of phenotype. From a phylogenetic perspective, it can be  
55 especially pernicious because the relationship between the traits in question may  
56 have no obvious link from a morphological or functional comparison alone.  
57 Intra-organismal links can be the targets of comparative developmental biology  
58 (Goswami and David Polly, 2010; Kelly and Sears, 2010; Stoessel et al., 2013;  
59 Goswami et al., 2014) or functional investigations.

60 • **Evolutionary dependence:** this is the result of sets of characters co-evolving due  
61 to selection, likely related to functional links between two traits that help serve an  
62 overall lifestyle trait. Unlike the case of intra-organismal dependence, there need  
63 not be an intrinsic constraint that causes these traits to covary. For example, in  
64 vertebrates, axial elongation can be correlated to limb reduction with snake-like  
65 bodies evolving multiple times in numerous tetrapod lineages. This is thought to

66 correspond to adaptations for fossoriality or aquatic lifestyles. Such covariances  
67 are generally studied in the context of a given phylogeny, often one derived from  
68 molecular data with the morphological traits of interest mapped on it. Many  
69 methods have been developed to study these correlations, especially since they  
70 can provide us with a lot of information on how specific groups acquired specific  
71 characteristics (Russell Lande, 1983; Maddison, 1990; Pagel, 1994; Mark Pagel,  
72 2006; Grabowski and Porto, 2016). However, these methods do not give us a  
73 means to objectively control correlations that might adversely affect phylogenetic  
74 inference.

75 • **Coding dependence:** this is the results of researcher methodology for defining  
76 or/and coding discrete morphological characters (Brazeau, 2011; Simões et al.,  
77 2017). Coding dependence manifests itself in several ways, particularly in coding  
78 redundant information. For instance, coding for the same absence in different  
79 characters creates state transformations associated with the loss or gain of a  
80 particular character. This occurs when a number of multistate characters include  
81 two variable feature states (e.g. large, small; red, blue etc.) in conjunction with  
82 absence. It is worth noting, however, that these correlations could also be due to  
83 the nature of the available data, especially in palaeontology. For example, when  
84 only one fragmentary molar is available to describe a specimen, researchers have  
85 to “extract” as much phylogenetic information from the available data as possible,  
86 potentially inducing correlations. This coding dependency is linked to hierarchical

87 dependency between characters (Wilkinson, 1995; Brazeau et al., 2017). Finally  
88 this can also be due to a bias in the amount of characters available. For example,  
89 in skulls, because of their complexity, there is a high likelihood of inducing  
90 correlation (by effectively reducing structural complexity to discrete characters).

91 Of course, the three sources of dependence have an interaction: characters describing  
92 the left and right lower/upper molars will have induced dependence due to the  
93 modularity of the molars, their shared history and the duplicated coding. Logical  
94 dependence, however, is easily distinguished prior to phylogenetic inference, while the  
95 two other ones (intra-organismal and evolutionary) are much harder. However, the  
96 development of algorithms and software has not yet caught up with the need to deal  
97 with these interdependencies (De Laet, 2015; Brazeau et al., 2017). Intra-organismal  
98 dependence requires more detailed, often extremely time-consuming studies (and  
99 possibly beyond the limits of available technology). Even after all of the effort is  
100 expended, the results might then only be known for a single (model) species.  
101 Evolutionary dependence itself requires the resolution of a phylogenetic tree, and is  
102 best determined by independent character sets. This is frequently accomplished by  
103 mapping morphological traits on molecular phylogenetic trees.

104 These sources of dependence between characters are well studied in biology.  
105 Biological and evolutionary dependences are inherent parts to Evo-Devo and  
106 macroevolutionary studies and best practices to avoid coding-induced dependences are  
107 commonly known and applied. However, eventually, all these characters, whether they

108 are independent or not are analysed through phylogenetic inferences software that are  
109 blind to these distinctions. In fact, what the software are confronted with is a two  
110 dimensional matrix problem that renders the morphological subtleties described  
111 opaque. This introduces a new, less studied, source of character dependence:  
112 **Correlation between characters detected by the software:** this is the result how  
113 software actually interprets the differences between characters. The vast majority of  
114 phylogenetic software ignores both the character's definition and the different states  
115 signification (simply treating them as different or similar tokens). Therefore a great  
116 number of characters and - traditionally - a few number of tokens can easily lead to  
117 dependence between characters. For example, if we consider the following matrix  
118 containing four cetartiodactyls - say a pig (e.g. *Sus*), a deer (*Cervus*), a hippo  
119 (*Hippopotamus*) and a whale (*Balaenoptera*) - and four binary characters - say (**C1**:  
120 presence (1) or absence (0) of an astragalus; **C2**: presence (0) or absence (1) of baleen;  
121 **C3**: presence (0) or absence (1) of a left astragalus with a double pulley; **C4**: presence  
122 (0) or absence (1) of a right astragalus with a double pulley:

123         In the example in Table 1, the characters **C1** and **C2** are the most likely to be  
124 truly independent; characters **C3** and **C4** suffer from a coding induced dependency;  
125 characters **C1** and **C3/C4** have an evolutionary induced dependency and again,  
126 characters **C2** and **C3/C4** are likely to be independent. Yet a phylogenetic software will  
127 treat all these four characters in exactly the same way: only the sheer difference  
128 between the character states tokens will be used in order to infer the tree. Some

|                     | C1 | C2 | C3 | C4 |
|---------------------|----|----|----|----|
| <i>Sus</i>          | 1  | 1  | 1  | 1  |
| <i>Cervus</i>       | 1  | 1  | 1  | 1  |
| <i>Hippopotamus</i> | 1  | 1  | 1  | 1  |
| <i>Balaenoptera</i> | 0  | 0  | 0  | 0  |

Table 1: Example of a matrix with software induced character correlation. **C1**: presence (1) or absence (0) of an astragal; **C2**: presence (0) or absence (1) of baleens; **C3**: presence (0) or absence (1) of a left astragalus with a double pulley; **C4**: presence (0) or absence (1) of a right astragal with a double pulley.

129 characters will therefore be expected to covary in non-phylogenetic way, and that this  
130 phenomenon can reasonably be expected to mislead phylogenetic analysis. Yet the  
131 question has never been explored through a thorough simulation framework (although  
132 it has been tackled empirically for morphological data Dávalos et al. 2014 or molecular  
133 data Zou and Zhang 2016).

134 How does these correlation really affect topology? We expect matrices with a  
135 high level of correlation to recover precise but inaccurate topologies but will matrices  
136 with low level of correlation (i.e. with high levels of homoplasy) actual cancel out the  
137 effects of correlation? Here we formally assess the effect of discrete character's  
138 correlation using simulated data. We propose a new distance metric to measure the  
139 difference between characters (as a proxy for these three sources of correlation as



140 interpreted by the software) and a protocol to modify discrete morphological matrices  
141 to increase/decrease the overall differences or similarities between characters. We  
142 found that overall, there is a detectable effect of character correlation on topology  
143 where an increase in character dependence results in a decrease in the ability to recover  
144 the correct topology. These results, however, vary greatly in magnitude depending on  
145 the size of matrix and the inference method used.

146

## METHODS

147 To assess the effects of character correlation on the accuracy of phylogenetic  
148 inference we generated a series of matrices exhibiting different levels of correlation  
149 between some characters (Fig.1 - note that each step is described in more details below):

150 1. **Simulating matrices:** we simulated discrete morphological matrices with 25, 75  
151 and 150 taxa for 100, 350 and 1000 characters, hereafter called the “normal”  
152 matrices. This step resulted in 9 matrices.

153 2. **Modifying matrices:** we changed the “normal” matrices by modifying the  
154 characters in order to maximise or minimise characters differences (hereafter  
155 called respectively “maximised” and “minimised” matrices) by removing  
156 respectively the least different or most different characters and replacing them  
157 randomly by the remaining characters. Our protocol for measuring character  
158 difference is detailed below.

159 We also randomly duplicated characters from the “normal” matrices without  
160 biasing towards maximising or minimising character differences to create  
161 randomised matrices (hereafter called the “randomised” matrices - equivalent to a  
162 null expectancy). This step resulted in 36 matrices.

163 **3. Inferring topologies:** we inferred the topologies from the “normal”,  
164 “maximised”, “minimised” and “randomised” matrices using both maximum  
165 parsimony and Bayesian inference. Hereafter, the resultant topologies are called  
166 the “normal”, “maximised”, “minimised” and “randomised” trees). This step  
167 resulted in 72 topologies.

168 **4. Comparing topologies:** finally, we compared the “normal” to the “maximised”,  
169 “minimised” and “randomised” trees to measure the effect of character  
170 correlation on topology.

171 Each step was replicated 35 times and are described below in more detail, along with  
172 our proposed definition for measuring the difference between characters.

### 173 *Measuring differences between characters*

174 To measure the effect of character correlation as interpreted by the phylogenetic  
175 software, we define characters as being entirely correlated if they give the same  
176 phylogenetic information. In order to measure this, we propose a new distance metric  
177 to measure the difference between two characters:

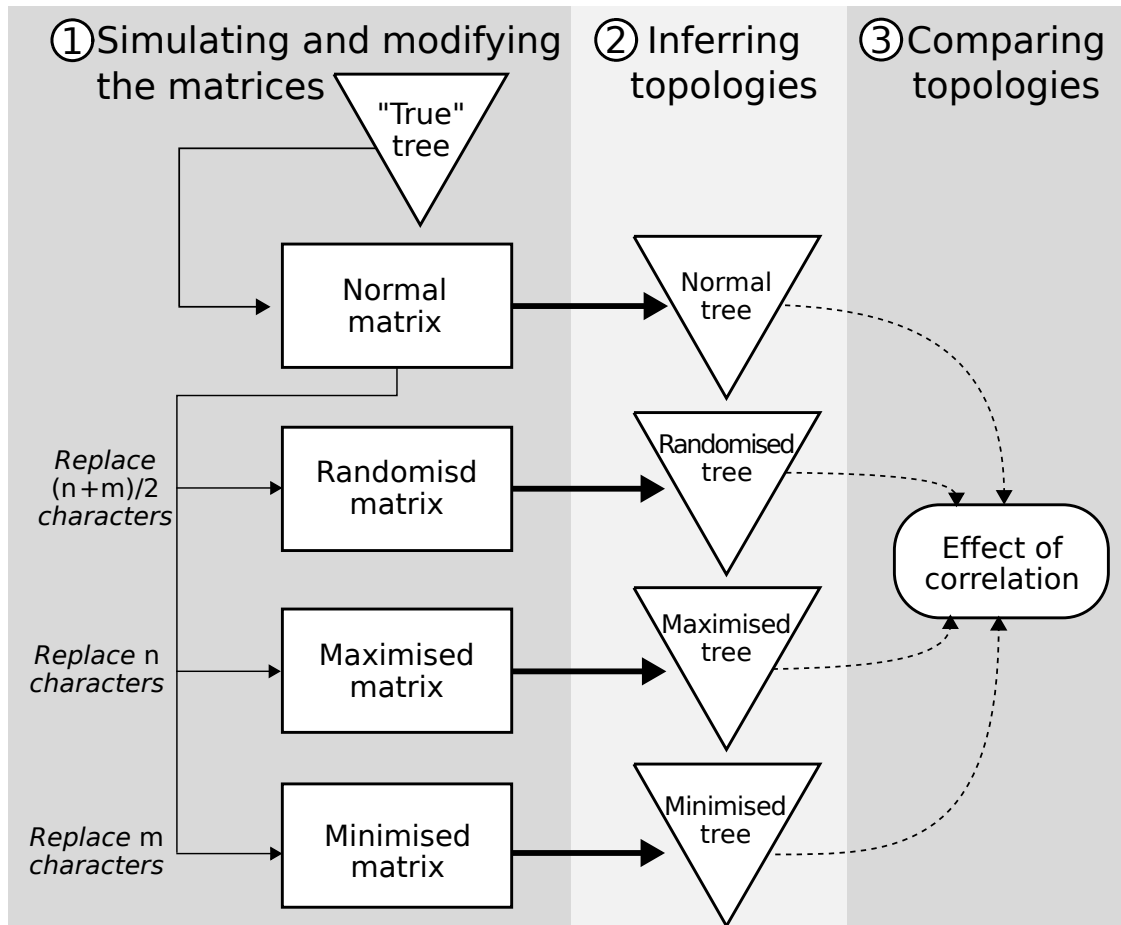

Figure 1: Outline of the simulation protocol: the first step includes both the simulation and the modification of the matrices (thin solid lines); the second step includes tree inference using MP and BPP methods (thick solid lines); the third step includes comparing the resulting tree topologies (dashed lines).  $n$  and  $m$  corresponds to the number of characters with a character difference  $< 0.25$  and  $> 0.75$  respectively.

178 *Character Difference (CD).*—

$$CD_{(x,y)} = 1 - 2 \left( \left| \frac{\sum_i^n |x_i - y_i|}{n} - \frac{1}{2} \right| \right) \quad (1)$$

179 Where  $n$  is the number of taxa with comparable characters  $x, y$  and  $x_i, y_i$  are each  
180 character's state for the  $i^{th}$  taxon.  $CD$  is a continuous distance metric bounded between  
181 0 and 1 (see the mathematical demonstration in the supplementary material 1). Since  
182 we are considering differences as being only Fitch-like (non-additive) and unweighted,  
183 we calculated the difference between character states in a qualitative way. Two same  
184 character states tokens have a difference of zero and two different ones have a  
185 difference of one (e.g.  $0 - 0 = 0$  or  $1 - 8 = 1$ ). Additionally, we only consider  
186 differences for taxa with shared information (i.e. a Gower distance; Gower, 1971).

187 We standardised each character by arbitrarily modifying their character state  
188 tokens (or symbols) by order of appearance. In other words, we replaced all the  
189 occurrences of the first token to be 1, the second to be 2, etc. This procedure was used  
190 to treat all the characters are unordered with no assumption on the meaning of the  
191 character state (e.g. in a binary character 0 is not necessary ancestral to 1). It also  
192 greatly improved the speed of our algorithm implementation to compare the characters.  
193 This way, a character  $A = \{2, 2, 3, 0, 0, 3\}$  for six taxa would be standardised as  $A' =$   
194  $\{1, 1, 2, 3, 3, 2\}$  (following the  $xyz$  notation in Felsenstein, 2004, p.13). Note that in  
195 terms of phylogenetic signal, both  $A$  and  $A'$  are exactly identical (forming three distinct  
196 splits in the tree inference process).

197 When the character difference is null (0) it means that characters convey the

198 same phylogenetic signal (i.e. characters are entirely correlated). When the character  
199 difference is maximal (1) it means it conveys the greatest difference in phylogenetic  
200 signal (i.e. characters are uncorrelated). It is important to stress that a character  
201 difference of 0 (i.e. the same phylogenetic signal) does not mean the opposite of 1 (i.e.  
202 *not* the opposite phylogenetic signal but the most different number of implied splits) .  
203 For example with three characters  $A = \{0, 1, 1, 1\}$ ,  $B = \{1, 0, 0, 0\}$  and  $C = \{0, 1, 2, 3\}$ ,  
204  $CD_{(A,B)} = 0$  and  $CD_{(A,C)} = 1$ . Because the character is continuous and bounded  
205 between  $(0, 1)$ , it can be interpreted as the probability of two characters leading to a  
206 different set of splits (i.e. a different phylogenetic signal).

### 207 *Simulating discrete morphological matrices*

208 To simulate the matrices we applied a protocol very similar to Guillerme and Cooper  
209 (2016b). First, we generate random birth-death trees with the birth ( $\lambda$ ) and death ( $\mu$ )  
210 parameters sampled from a uniform  $(0, 1)$  distribution maintaining  $\lambda > \mu$  using the  
211 `diversitree` R package (v0.9-8; FitzJohn, 2012) and saving the tree after reaching either  
212 25, 75 or 150 taxa. For each tree, we arbitrarily set the outgroup to be the first taxon  
213 (alphabetically) thus effectively rooting the trees on this taxon. These trees are hereafter  
214 called the “true” trees (see distinction below). We then simulated discrete  
215 morphological characters on the topology of these trees using the either of the two  
216 following models:

- 217 • The morphological HKY-binary model (O’Reilly et al., 2016) which is an HKY  
218 model (Hasegawa et al., 1985) with a random states frequency (sampled from a

219 Dirichlet distribution  $Dir(1, 1, 1, 1)$ ) and using a transition/transversion rate of 2  
220 (Douady et al., 2003) but where the purines (A,G) were changed into state 0 and  
221 the pyrimidines (C,T) in state 1. This model has the advantage of not favouring  
222 Bayesian inference (since it doesn't use an Mk model; O'Reilly et al., 2016, ; see  
223 discussion) but the downside of it is it can only generate binary state characters  
224 (or 4 states; Puttick et al., 2017).

225 • To generate more than binary states characters, we used the Mk model (Lewis,  
226 2001). We draw the number of character states with a probability of 0.85 for  
227 binary characters and 0.15 for three state characters (Guillerme and Cooper,  
228 2016b; Zou and Zhang, 2016). This model assumes a equal transition rate between  
229 character states which might seem overly simplistic, excluding other observed  
230 transition patterns (e.g. Dollo characters; Dollo, 1893; Wright et al., 2015).  
231 Recently however, Wright et al. (2016) have shown that an equal rate transition is  
232 still the most present in empirical data.

233 For each character, both models (morphological HKY-binary or Mk) where chosen  
234 randomly and run with an overall evolutionary rate drawn from a gamma distribution  
235 ( $\beta = 100$  and  $\alpha = 5$ ). These low evolutionary rate values allowed reduction in the  
236 number of homoplastic character changes, thus reinforcing the phylogenetic information  
237 in the matrices. We re-simulated every invariant characters to obtain a matrix with no  
238 invariant characters in order to better approximate real morphological data matrices. To  
239 ensure that our simulations were reflecting realistic observed parameters, we only

240 selected matrices with Consistency Indices (CI) superior to 0.26 (O'Reilly et al., 2016).

241 For each tree with 25, 75 or 150 taxa we generated matrices with 100, 350 and  
242 1000 characters following O'Reilly et al. (2016). The matrices were generated using the  
243 `dispRity` R package (Guillerme, 2016). To estimate the variance of our simulations and  
244 assess the effect of our random parameters, we repeated this step 35 times resulting in  
245 315 "normal" morphological matrices.

### 246 *Modifying the matrices*

247 We calculated the pairwise character differences for each generated matrix using the  
248 `dispRity` R package (Guillerme, 2016). We then modified the matrices to either  
249 maximise or minimise the pairwise character differences for each matrix using three  
250 different algorithms. For maximising the pairwise differences between characters, we  
251 selected the characters that were the most similar to all the others (i.e. with an average  
252 character difference  $< 0.25$ ) and replaced them randomly by any of the remaining  
253 characters. This operation increased the overall pairwise character difference in the  
254 matrix thus making the characters more dissimilar. Conversely, for minimising the  
255 pairwise character differences, we selected the most dissimilar characters (i.e. with an  
256 average character difference  $< 0.75$ ) and randomly replaced them with the remaining  
257 ones. Finally, because this operation effectively changes the weight of characters (i.e.  
258 giving the characters  $< 0.25$  or  $> 0.75$  a weight of 0 and giving the randomly selected  
259 remaining characters a weight of +1), we randomly replaced the average number of  
260 characters replaced in the character maximisation and minimisation by any other

261 characters as a randomised expectation modification (i.e. randomly weighting  
262 characters). Each of the three matrices are effectively a bootstrap pseudo-replication of  
263 the “normal” matrix with the “randomised” one being a random one and the  
264 “maximised” and “minimised” being conditional bootstraps. This step resulted in a  
265 total of 1260 matrices (hereafter called the “normal”, “maximised”, “minimised” and  
266 “randomised” matrices - see Fig. 2 for an illustration). The algorithms for the three  
267 modifications are available on GitHub  
268 (<https://github.com/TGuillerme/CharactersCorrelation>)

### 269 *Inferring topologies*

270 We inferred the topologies with both BPP and MP using MrBayes (v3.2.6; Ronquist  
271 et al., 2012) and PAUP\* (v4.0a151; Swofford, 2001) respectively. For both methods, we  
272 used the arbitrarily chosen outgroup in the simulations to root our trees. The  
273 maximum parsimony inference was run using a heuristic search with random sequence  
274 addition replicate 100 times with a limit of  $5 \times 10^6$  rearrangements per replicates  
275 (`hsearch addseq=random nreps=100 rearrlimit=5000000 limitperrep=yes`).

276 Bayesian inference was run using an *Mk* model with ascertainment bias and four  
277 discrete gamma rate categories (`Mkv 4Γ - lset nst=1 rates=gamma Ngammacat=4`) with  
278 an variable rate prior an exponential (0.5) shape (`prset ratepr=variable`  
279 `Shapepr=Exponential(0.5)`). We ran two runs of 6 chains each (2 hot, 4 cold) for a  
280 maximum of  $1 \times 10^9$  generations with a sampling every 200 generations. We  
281 automatically stopped the MCMC when the average standard deviation of split



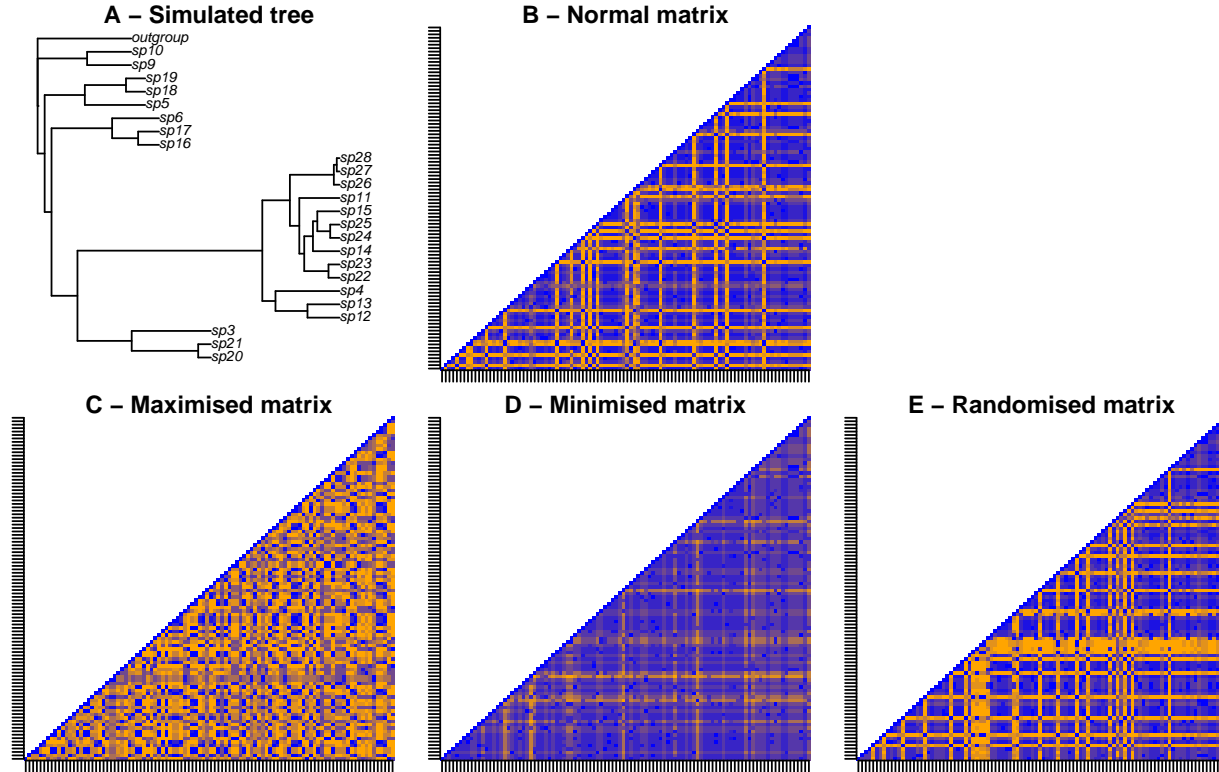

Figure 2: Example illustration of the protocol for modifying matrices. The matrices represent the pairwise character differences for 100 characters. Blue colours correspond to low character differences and orange colours correspond to high character differences. **A** - a random Birth-Death tree is simulated and used for generating the “normal” matrix (**B**), characters in this matrix are then removed or duplicated to favour maximised (**C**), minimised (**D**) or randomise character difference (**E**). The differences between the characters is low in **C** (minimised compared to **A**) implying a high correlation between the characters. Conversely, the character differences is high in **D** (maximised compared to **A**) implying a low correlation between the characters.

282 frequencies (ASDSF) between both runs fell below 0.01 (with a diagnosis every  $1 \times 10^4$   
283 generations - mcmc nruns=2 Nchains=6 ngen=1000000000 samplefreq=200  
284 printfreq=2000 diagnfreq=10000 Stoprule=YES stopval=0.01 mcmcdiagn=YES). Due  
285 to cluster hardware requirements and to save some time, when chains didn't converged  
286 and the runs exceeded 5GB each, we aborted the MCMC and computed the consensus  
287 tree from the unconverged chains. In practice, these few MCMC got stuck at an ASDSF  
288 around (but not below) 0.01.

289 A strict majority rule tree was then calculated for both Bayesian and maximum  
290 parsimony trees. For the Bayesian consensus trees, the 25% first trees of the posterior  
291 tree distribution were excluded as a burnin. The 2880 tree inferences took around one  
292 CPU century on the Imperial College High Performance Computing Service (2-3GHz  
293 clock rate; ICHPC, 2011).

### 294 *Comparing topologies*

295 We compared the topologies using the same approach as in Guillerme and Cooper  
296 (2016b): we measured both the Robinson-Foulds distance (Robinson and Foulds, 1981)  
297 and the triplets distance (Dobson, 1975) between the trees inferred from the  
298 "maximised", "minimised" and "randomised" matrices and the tree inferred from the  
299 "normal" matrix. We explored the effect of character difference on recovering the  
300 "normal" topology by comparing the "maximised", "minimised" and "randomised"  
301 trees to the "normal" tree (Figs 3 and 4 and supplementary materials 3 Figs 1 and 2).  
302 Note that we are not comparing the trees to the "true" tree used to simulate the

303 matrices. First, in biology, this tree is always unknown. Second, our objective is to  
304 measure the direct effect of character correlation approximated by the difference in  
305 topology between the “normal”, “maximised” and “minimised” trees. When measuring  
306 the difference between these trees and the “true” tree, we would also confound the  
307 effect of simulating a birth-death tree and simulating a discrete morphological matrices  
308 from it.

309         The metric scores were calculated using the TreeCmp javascript (Bogdanowicz  
310 et al., 2012). The measurements were then standardised using the Normalised Tree  
311 Similarity metric ( $NTS$ ; i.e. centering the metrics scores using the mean metric score for  
312 1000 pairwise comparisons between random trees with  $n$  taxa; Bogdanowicz et al.,  
313 2012; Guillerme and Cooper, 2016b). When the normalised metric has a score of one it  
314 means both trees are identical, when it has a score of zero it means the trees are no  
315 more different than expected by chance and when it has a score  $< 0$  the trees are more  
316 different than expected by chance. The normalised score for both metrics thus reflects  
317 two distinct aspects of tree topology: (1) the Normalised Robinson-Foulds ( $NTS_{RF}$ )  
318 Similarity reflects the conservation of clades (i.e. a score close to 1 indicates that most  
319 clades are identical in both trees); and (2) the Normalised Triplets Similarity ( $NTS_{Tr}$ )  
320 reflects the position of taxa (i.e. a score close to 1 indicates that most taxa have the same  
321 neighbours in both trees).

322         Because both  $NTS_{RF}$  and  $NTS_{Tr}$  metrics are bounded at one. The residuals of  
323 any model based on the  $NTS$  scores were not normal thus preventing the use of

324 parametric tests for comparisons (see online material  
325 [https://rawgit.com/TGuillerme/CharactersCorrelation/master/Analysis/  
326 02-EffectCorrelationFullResults.html](https://rawgit.com/TGuillerme/CharactersCorrelation/master/Analysis/02-EffectCorrelationFullResults.html)). Similarly, a non-parametric Wilcoxon rank  
327 test (Hollander et al., 2013) would be biased in its p-value calculation due to the  
328 presence of equal values in the *NTS* distributions (e.g. when multiple trees are equal to  
329 the “normal” tree). Therefore, we used a combination of the Wilcoxon rank test with a  
330 Bonferonni-Holm corrections (to ensure our significant results were robust to Type I  
331 error rate inflation; Holm, 1979) and a simple non-parametric metric for measuring the  
332 probability of overlap between two distributions, the Bhattacharyya Coefficient (*BC*;  
333 Bhattacharyya, 1943; Guillerme and Cooper, 2016b; Soto et al., 2016). Thus, additionally  
334 to the Wilcoxon test results, we considered distribution to be significantly similar if they  
335 had an overlap probability  $> 0.95$  and different if they had an overlap probability  
336  $> 0.05$ . Comparisons falling between these range can not be designated as strictly  
337 similar/different but can still be ranked (e.g. for three distributions *A*, *B*, *C*, if  
338  $BC_{(A,B)} = 0.15$  and  $BC_{(A,C)} = 0.65$ , we cannot consider either distribution significantly  
339 different or similar but *B* still has a lower probability of being similar to *A* than *C*).

340 The resulting full simulation was 3.5TB big so is not shared here (though the  
341 parameters are). However, the resulting consensus trees on which the topological  
342 differences are calculated are available at  
343 <https://figshare.com/s/7a8fde8eaa39a3d3cf56>.

344

## RESULTS

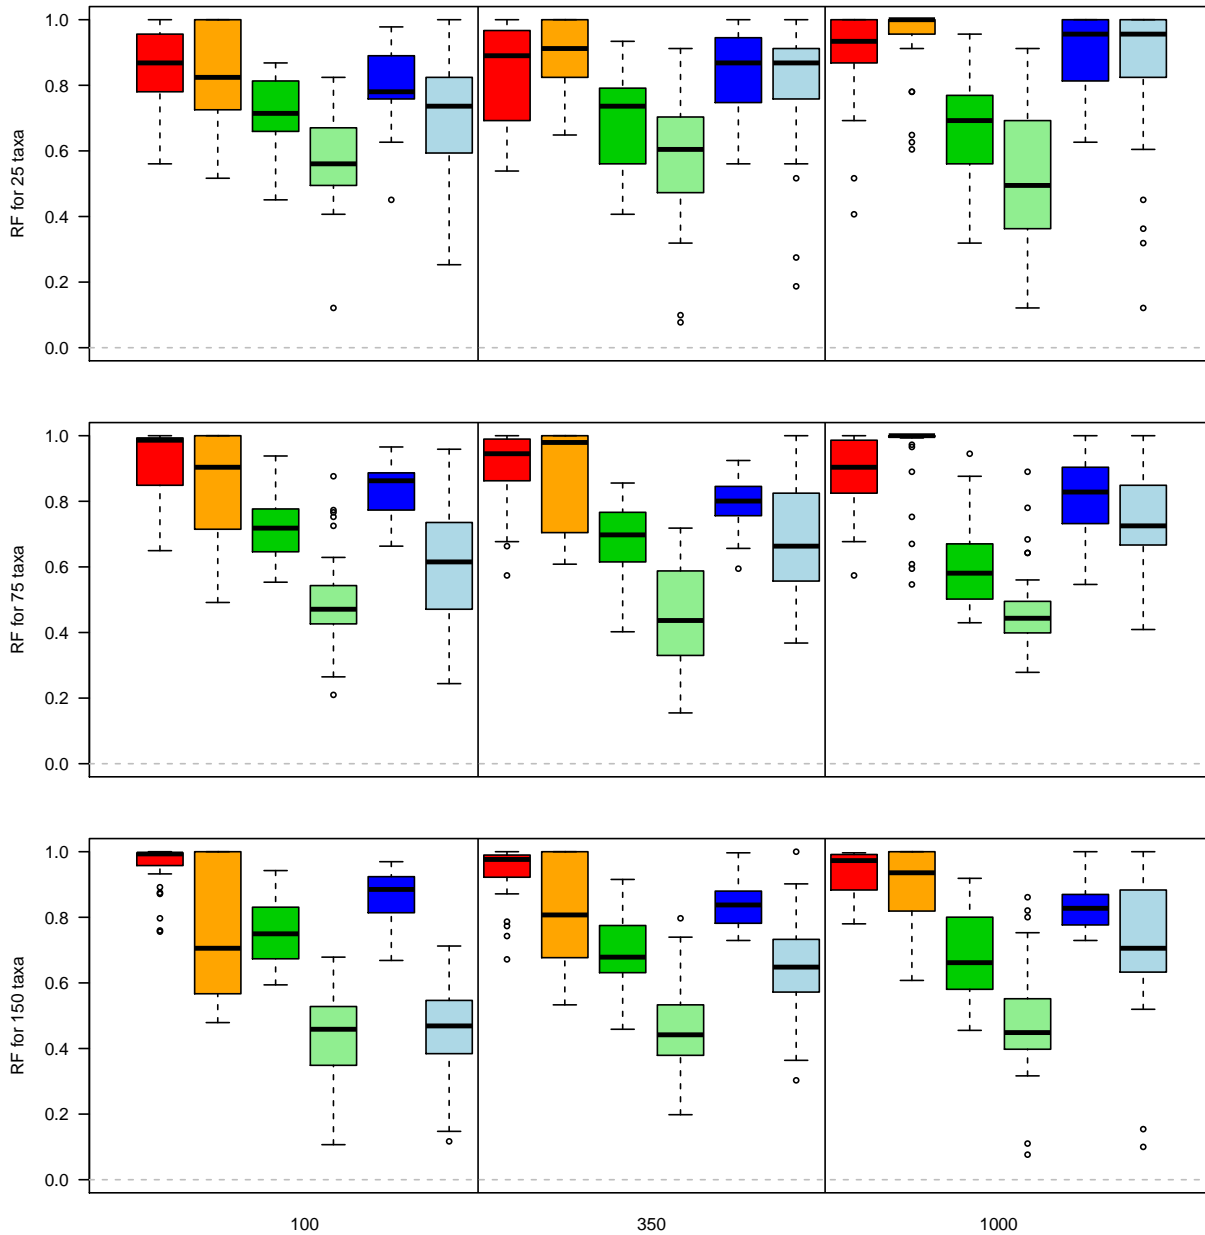

Figure 3: Effect of character difference on recovering the “normal” topology. The y axis represents the Normalised Tree Similarity using Robinson-Foulds distance for matrices with 25, 75 and 150 taxa from top to bottom respectively. The x axis represents the different character difference scenarios and tree inference method with the “maximised” character difference in Bayesian (red) and under maximum parsimony (orange), the “minimised” character difference in Bayesian (dark green) and under maximum parsimony (light green) and the “randomised” character difference in Bayesian (dark blue) and under maximum parsimony (light blue) for matrices of 100, 350 and 1000 characters in the panels from left to right.

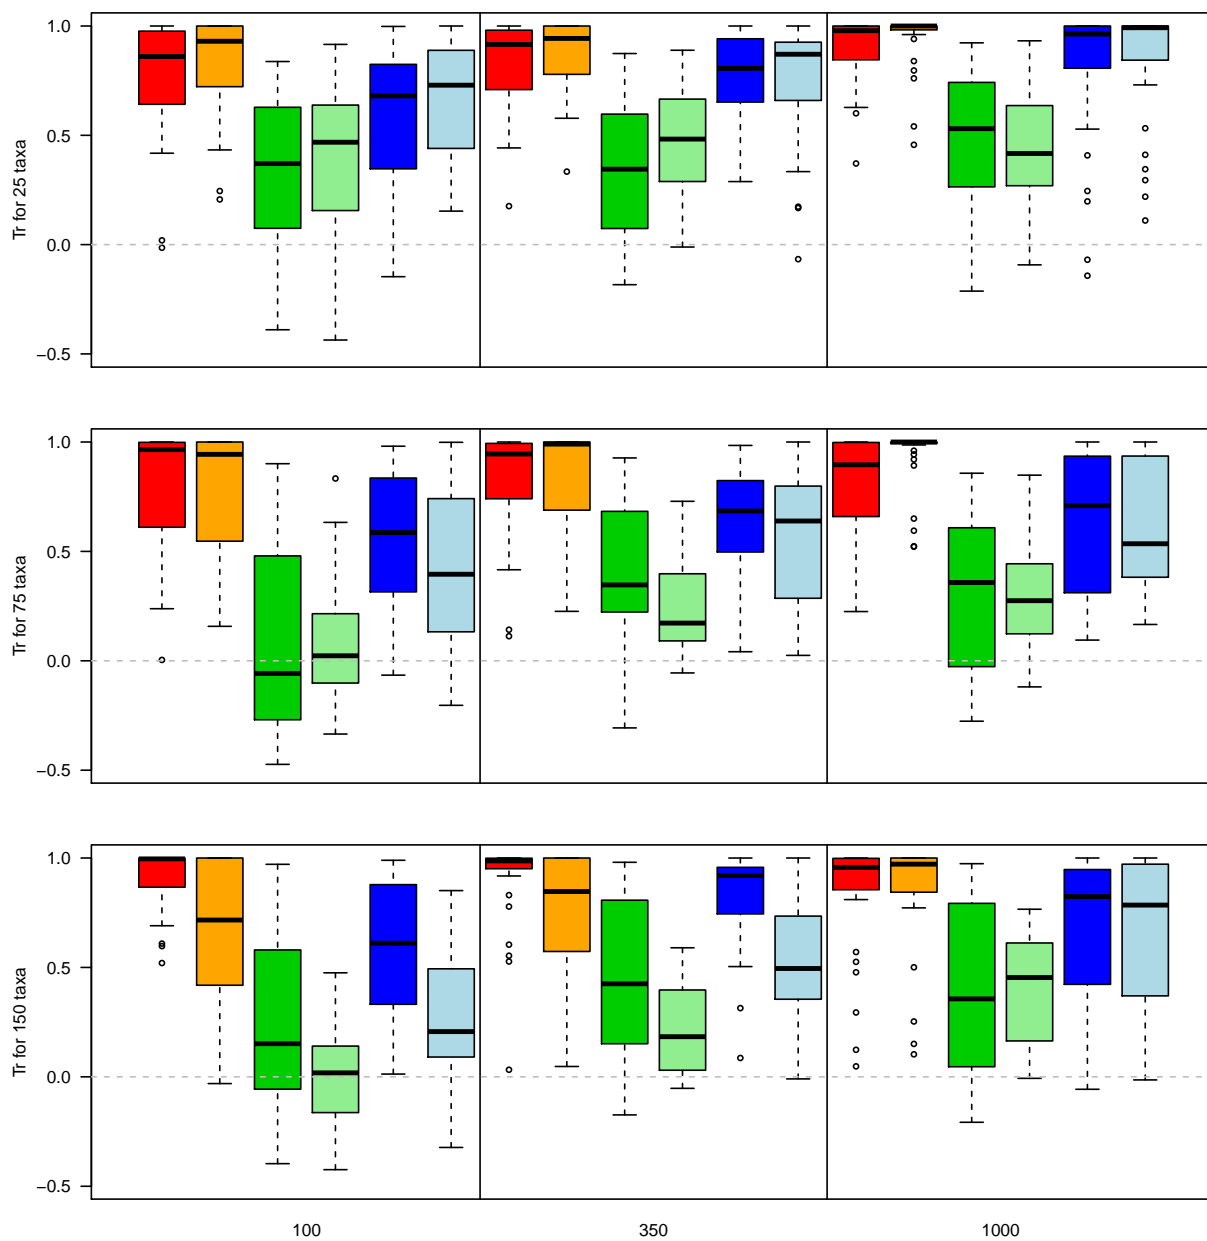

Figure 4: Effect of character difference on recovering the “normal” topology. The axis are identical to figure 3 but y axis represents the Normalised Tree Similarity using Triplets distance.

## Effect of character differences on topology

The overall amount of character difference in a matrix has an effect of the ability to recover the correct topology when maximising character difference leading to the smallest loss in phylogenetic information (median  $NTS_{RF} = 0.956$  and median  $NTS_{Tr} = 0.839$ ) followed by simply randomising the characters (median  $NTS_{RF} = 0.762$  and median  $NTS_{Tr} = 0.628$ ) and minimising the character difference (median  $NTS_{RF} = 0.605$  and median  $NTS_{Tr} = 0.303$  - see supplementary material 3 for the full summary statistics). There is a significant difference between all scenarios (maximising, minimising and randomising) with the highest probability of overlap being between maximising and randomising the character difference (Bhattacharyya Coefficient of 0.873 for the  $NTS_{RF}$  and 0.908 for the  $NTS_{Tr}$  - Table 2) and the lowest probability between maximising and minimising the character difference (Bhattacharyya coefficient of 0.573 for the  $NTS_{RF}$  and 0.614 for the  $NTS_{Tr}$  - Table 2)

*Number of characters.*— This effect of the character difference is not dependent on the number of characters when looking at clade conservation (i.e.  $NTS_{RF}$ ). The median  $NTS_{RF}$  was similar for 100, 350 and 1000 characters (0.730, 0.745, 0.767 respectively - see supplementary materials 3) with a significant difference only between 100 and 1000 and 350 and 1000 characters (Table 3). The number of characters affects the character difference more in terms of taxon placement for a low number of characters (median  $NTS_{Tr}$  for 100, 350 and 1000 characters equals 0.544, 0.693, 0.799 respectively - see supplementary materials 3) with a significant difference between 100 and 350 or 1000

| metric | test      | bhatt.coeff | statistic  | p.value |
|--------|-----------|-------------|------------|---------|
| RF     | maxi:mini | 0.573       | 356436.000 | 0       |
|        | maxi:rand | 0.873       | 287225.000 | 0       |
|        | mini:rand | 0.856       | 95841.500  | 0       |
| Tr     | maxi:mini | 0.614       | 358800.000 | 0       |
|        | maxi:rand | 0.908       | 288223.500 | 0       |
|        | mini:rand | 0.858       | 98507.500  | 0       |

Table 2: Difference between the pooled scenarios. Bhatt.coeff is the Bhattacharrya Coefficient (probability of overlap), the statistic and the p.value are from a non-parametric wilcoxon test (with Bonferonni-Holm correction)

366 characters (Table 3). However, these differences have to be contrasted by a very high  
 367 probability of overlap between each number of characters and metrics (Bhattacharrya  
 368 Coefficient always  $> 0.95$ ) suggesting that the significant effects of the number of  
 369 characters still leads to really similar distributions.

370 *Number of taxa.*—

371 Similar to the effect of number of characters on character difference, the number  
 372 of taxa seems to have only a marginal effect. A low number of taxa (25) resulted in  
 373 significant differences with both 75 or 150 taxa in both  $NTS_{RF}$  and  $NTS_{Tr}$  but no  
 374 differences between 75 and 150 taxa (medians for 25, 75 and 150 taxa equals 0.802, 0.76,  
 375 0.763  $NTS_{RF}$  and 0.758, 0.588 and 0.615  $NTS_{Tr}$  respectively - Table 4 and see



| metric | test       | bhatt.coeff  | statistic  | p.value      |
|--------|------------|--------------|------------|--------------|
| RF     | c100:c350  | <b>0.99</b>  | 190357.500 | 1            |
|        | c100:c1000 | <b>0.98</b>  | 174085.500 | <b>0.001</b> |
|        | c350:c1000 | <b>0.984</b> | 180460.000 | <b>0.032</b> |
| Tr     | c100:c350  | <b>0.961</b> | 166609.500 | 0            |
|        | c100:c1000 | <b>0.956</b> | 151389.500 | 0            |
|        | c350:c1000 | <b>0.981</b> | 178793.500 | <b>0.014</b> |

Table 3: Difference between the pooled number of characters. Bhatt.coeff is the Bhat-tacharrya Coefficient (probability of overlap), the statistic and the p.value are from a non-parametric wilcoxon test (with Bonferonni-Holm correciton)

376 supplementary materials 3). Again, however, the significant differences have to be  
377 contrasted with still high probabilities of overlaps for each  $NTS_{RF}$  and  $NTS_{Tr}$   
378 distributions for every number of taxa (Table 4).

### 379 *Effect of character differences on the inference method*

380 Regarding the inference method, there is a significant difference in clade  
381 conservation between Bayesian and maximum parsimony (Table 5 - median  $NTS_{RF}$  of  
382 0.828 and 0.679 respectively) but not in terms of individual taxon placements (Table 5 -  
383 median  $NTS_{Tr}$  of 0.738 and 0.601 respectively).

### 384 *Combined effects of taxa, characters and correlation on topology*

| metric | test     | bhatt.coeff  | statistic  | p.value      |
|--------|----------|--------------|------------|--------------|
| RF     | t25:t75  | <b>0.976</b> | 218421.000 | <b>0.012</b> |
|        | t25:t150 | <b>0.988</b> | 220529.000 | <b>0.004</b> |
|        | t75:t150 | <b>0.99</b>  | 201037.000 | 1            |
| Tr     | t25:t75  | <b>0.976</b> | 233282.000 | <b>0</b>     |
|        | t25:t150 | <b>0.978</b> | 227288.000 | <b>0</b>     |
|        | t75:t150 | <b>0.992</b> | 194201.000 | 1            |

Table 4: Difference between the pooled number of taxa. Bhatt.coeff is the Bhattacharyya Coefficient (probability of overlap), the statistic and the p.value are from a non-parametric wilcoxon test (with Bonferonni-Holm correction)

385 When looking at the combined effect of each parameter, the “maximised” and  
386 “minimised” scenarios are always significantly different with no high probability of  
387 overlap for both  $NTS_{RF}$  and  $NTS_{Tr}$  (Wilcoxon rank test p.value < 0.05 and  
388 Bhattacharyya Coefficient < 0.95 - see supplementary material 3). The same differences  
389 are observed when comparing the “maximised” scenario against the “randomised” one  
390 expect for: (1) the Bayesian inference with 25 taxa (with 100, 350 and 1000 characters)  
391 and with 75 taxa with 1000 characters for both  $NTS_{RF}$  and  $NTS_{Tr}$ ; and (2) the  
392 maximum parsimony for 25 taxa (with 350 and 1000) characters for both  $NTS_{RF}$  and  
393  $NTS_{Tr}$  and 75 taxa with 100 characters for  $NTS_{Tr}$ . Identically, there was always a  
394 significant difference between the “minimised” scenario and the “randomised” one was

| metric | test               | bhatt.coeff  | statistic  | p.value |
|--------|--------------------|--------------|------------|---------|
| RF     | bayesian;parsimony | 0.891        | 579437.500 | 0       |
| Tr     | bayesian;parsimony | <b>0.984</b> | 470621.500 | 0.084   |

Table 5: Difference between the pooled methods. Bhatt.coeff is the Bhattacharyya Coefficient (probability of overlap), the statistic and the p.value are from a non-parametric wilcoxon test (with Bonferonni-Holm correction)

395 expect for the matrix of 150 taxa and 100 characters under maximum parsimony for  
396  $NTS_{RF}$  and the matrix of 150 and 1000 characters under Bayesian inference for  $NTS_{Tr}$ .  
397 The full list of comparisons and summary statistics are available in the supplementary  
398 materials 3.

## 399 DISCUSSION

### 400 *Effect of character differences on topology*

401 As expected, there is a significant effect of the character difference in the ability to  
402 recover the correct topology. The character difference metric can be seen as the inverse  
403 of character correlation (see Methods ): a high character difference approximates a low  
404 level of character correlation and vice versa. When characters are correlated, one could  
405 expect the matrices to convey a strong (but potentially misleading) phylogenetic signal  
406 since every character agrees with each other and conversely, when characters are

407 uncorrelated, one could expect them to convey a weaker phylogenetic signal with a  
408 high amount of homoplasy. Intuitively, this would lead the “minimised” character  
409 difference scenario to lead to incorrect but consistent trees, the “maximised” scenario to  
410 lead to poorly resolved ones (really homoplastic trees) and the “randomised” scenario to  
411 perform the best at recovering the correct topology. Although the expected results  
412 appear to be true for a low character difference scenario, increasing the character  
413 difference surprisingly improves the ability to recover the “normal” topology both in  
414 terms of clade conservation ( $NTS_{RF}$ ) and taxa placement ( $NTS_{Tr}$ ) for both inference  
415 methods (especially in bigger matrices; Figs 3 and 4). Furthermore, the trees generated  
416 by the “minimised” scenario do not appear better resolved (towards any topology) than  
417 the other scenarios (see Supplementary material 3, Figs 3, 4 and 5).

418 *Number of characters and taxa.*— Because of the nature of our simulation protocol, one  
419 could expect that the effect of character correlation would have increased with the  
420 number of characters (i.e. the more characters available, the more characters are  
421 modified in each scenario). Similarly, one could expect the number of taxa to have an  
422 effect of the raw ability to recover the “normal” topology (i.e. the more taxa, the more  
423 likely taxa are misplaced by chance).

424 Although we measured a significant difference between “small” and larger  
425 matrices (both in terms of number of taxa and characters; Tables 3 and 4), these  
426 differences have to be contrasted with the probability of overlap between the results  
427 distributions that are always really high between every matrices sizes (Bhattacharyya

428 Coefficients  $> 0.965$  for both the different number of characters and taxa). This suggest  
429 that the effect of character correlation on recovering the right topology is independent  
430 of the size of the matrix when pooling the data. For the number of characters, this  
431 suggests that the overall character difference metric is a good proxy for character  
432 correlation as it is independent of the number of characters analysed. Similarly, using  
433 the a Normalised Tree Similarity metric (*NTS*) accounts for the fact that topological  
434 difference is affected by the sheer number of taxa considered (i.e. we corrected for the  
435 expected difference when comparing two random trees with the same number of taxa).

#### 436 *Effect of character differences on the inference method*

437 When considering the pooled effect of the tree inference method, we only detected a  
438 significant difference between the Bayesian and the maximum parsimony trees in terms  
439 of clade conservation but none in terms of taxa placement (both using a Wilcoxon test  
440 and the Bhattacharyya Coefficient; Table 5). The difference in the ability of each method  
441 to recover the “correct” topology has been heavily discussed in the last five years with  
442 some indications that Bayesian inference will outperform parsimony when analysing  
443 discrete morphological characters alone (Wright and Hillis 2014; O’Reilly et al. 2016;  
444 Puttick et al. 2017; although some critics have raised issues with these investigations  
445 Spencer and Wilberg 2013; Goloboff et al. 2017). In this study, it is possible that our  
446 simulation protocol for generating the characters (favouring slightly more *Mk*-based  
447 characters rather than HKY ones) could slightly favour Bayesian inference over  
448 maximum parsimony, however, our protocol for selecting matrices (i.e. those with in a



470 Here we mention three different types of character correlations but evolutionary  
471 biologists are mainly interested in the intra-organismal and evolutionary correlations  
472 (e.g. in evo-devo Goswami and Janis 2006; or in macroevolution FitzJohn et al. 2014).  
473 These two types of correlations can only be studied *a posteriori* with a phylogenetic  
474 hypothesis and should not used *a priori* as a criterion to select characters. In other  
475 words, intra-organismal and evolutionary correlation should be studied based on an  
476 underlying phylogenetic framework making the correlation induced by data collection  
477 (i.e. coding correlation) the only type of correlation that can affect the phylogeny *a*  
478 *priori*. This dichotomy thus creates a trade of between: (1) coding fewer characters  
479 (stochastically reducing *a priori* correlation) but making the *a posteriori* correlation more  
480 dependent on the coding; and (2) coding more characters (increasing *a priori*  
481 dependence) but allowing the *a posteriori* correlation being less dependent on the  
482 coding correlations.

483         It is important to note that the two other sources of character correlation could  
484 also be present in our simulations although they were not explicitly modelled: (1)  
485 evolutionary correlation is implied by simulating the characters based on Birth-Death  
486 trees; and (2) intra-organismal correlation could also be present in the matrices for  
487 those characters randomly simulated but sharing similar evolutionary simulation  
488 regimes (i.e. creating “modules” of characters). However, the effect of these sources of  
489 correlation was out of the scope of this study and would have required *a posteriori*  
490 changes to the matrices which are - when using empirical data - at best bad practice

491 and at worth dishonest.

492

### *Limitations*

493 First, simulating evolutionary history is complex. Not only because the models we're  
494 using to infer phylogenies are ever improving (e.g. Heath et al., 2014; Wright et al.,  
495 2016) but also because generalising morphological evolution across vastly different  
496 organisms is probably impossible (see constricted discussions from Goloboff et al.,  
497 2018; O'Reilly et al., 2018). However, we do not compare the "maximised",  
498 "minimised" and "randomised" to the "true" tree but rather to the "normal" tree. This  
499 allows us to reduce the caveats from our simulations on the effect of character  
500 correlation since we only compare the simulation end products to each other (the  
501 outputs) rather than to the simulation inputs.

502       Second, measuring and modifying character correlation is difficult. In our  
503 simulation protocol we chose to create simulation by duplicating characters in a matrix  
504 to maximise or minimise correlation. In biology, this correlation arises from either  
505 intra-organismal or evolutionary mechanisms. This could lead to correlations between  
506 characters to be more present in some parts of the trees than other (e.g. in the case of  
507 inapplicable data Brazeau et al., 2017). However, because of the number of characters, it  
508 is actually complex to actually measure their correlation in a biological sense and is still  
509 actively discussed in the literature (Russell Lande, 1983; Maddison, 1990; Pagel, 1994;  
510 Mark Pagel, 2006; Goswami and Janis, 2006; Goswami and David Polly, 2010; Goswami  
511 et al., 2014; Grabowski and Porto, 2016). Additionally, as discussed in the introduction,



512 character correlation can also simply arise by chance due to the discrete coding scheme  
513 (i.e. some sets of characters can be highly correlated but effectively describe  
514 independent information). Therefore, we made the choice to simplify our simulations  
515 by generating character correlation as a stochastic process rather than a biological one.

516 Third, comparing phylogenetic inference methods is not trivial. As mentioned  
517 above, both maximum parsimony and Bayesian inference, although aiming (and often  
518 achieving) to infer evolutionary history only have similar outputs and vastly differ in  
519 how optimality is measured. But there are also difficulties in summarising both  
520 methods with consensus trees O'Reilly and Donoghue (2017). However, we want to  
521 point out again that here we're not comparing the methods to each other *per se* but  
522 rather how they both, individually, react to an increase or decrease of correlated  
523 characters.

### 524 *Potential applications*

525 Effectively, our simulation protocol bootstraps our data "with bias". In the  
526 "randomised" scenarios the data is simply randomly bootstrapped simply we  
527 randomly remove and resample characters (i.e. giving the weight of 0 to some and  $> 1$   
528 to other). However, in the "minimised" and "maximised" scenario, the bootstrapping  
529 we remove the characters with the lowest/highest overall character difference. For  
530 example, in the "maximised" scenario, we randomly remove some characters that are  
531 strongly correlated with other and randomly resample from the left characters.

532 It is noteworthy to point that in rather small matrices ( $25 \times 100$ ), there was no  
533 significant difference in terms of recovering the right topology when maximising or  
534 randomising the character differences. Since many discrete morphological matrices are  
535 of similar size (Guillerme and Cooper, 2016a) a simple bootstrap re-sampling (i.e. the  
536 equivalent of randomising the character differences in our analysis) will be sufficient to  
537 obtain a robust topology (*cf.* actively collecting different characters). In matrices with  
538 more taxa, however, the “maximised” scenario resulted in better topological recovery  
539 than any other scenarios. Applying this kind of bootstraps that maximises character  
540 difference by biasing the random sampling could thus results in better resolved trees.

## 541 *Conclusion*

542 Correlation between characters can be induced through three main phenomena:  
543 intra-organismal relationships, selection-driven covariation or biases in coding the  
544 characters yet only the latter can be improved upon to investigate phylogenetic  
545 relationships. Useful best practices guidelines (e.g. Brazeau, 2011; Simões et al., 2017)  
546 and algorithms for dealing with different types of character correlations (e.g. for  
547 characters hierarchy ?Brazeau et al., 2017) already exist. However, with the regain of  
548 popularity in discrete morphological data and the expansion of dataset size (e.g. Ni  
549 et al., 2013; O’Leary et al., 2013, with more than 1000 characters each), we can expect  
550 the correlation between characters to increase stochastically. Moreover, because  
551 phylogenetic inference software are unable to *a priori* differentiate these difference

552 correlations, it is important to understand to what extant topologies can be induced by  
553 such bias.

554 We found that character differences as a proxy for character correlation have a  
555 strong effect on recovering the “normal” topology: when character correlation was high  
556 (low character differences), the topology was always the furthest away from the  
557 “normal” topology. Conversely, when correlation between characters was low, the  
558 topology was always the closest to the “normal” topology. These results seem  
559 independent on the size of the matrix (number of taxa and/or characters) but can be  
560 influenced by the phylogenetic inference method used with Bayesian inference faring  
561 better in terms of clade conservation, especially in larger matrices.

562 However, in modest size matrices (25 taxa; 100 to 350 characters), the effect of  
563 actively choosing to minimise character correlation was not more significant than  
564 simply bootstrapping the matrix, suggesting that character correlation is more a  
565 problem in large discrete morphological matrices. For such matrices, minimising the  
566 character correlation (resampling characters < 25% different) or maximising it (> 75%)  
567 respectively significantly decreased and increased correct topological recovery  
568 compared to randomly resample matrices.

## 569 DATA AVAILABILITY, REPEATABILITY AND REPRODUCIBILITY

570 The consensus trees are available on figshare at  
571 <https://figshare.com/s/7a8fde8eaa39a3d3cf56>. The simulations are fully replicable

572 following the explanations at  
573 <https://github.com/TGuillerme/CharactersCorrelation>. The post-simulation  
574 analysis, tables and figures (reported in this manuscript) are fully reproducible see  
575 (<https://github.com/TGuillerme/CharactersCorrelation>).

576

## FUNDING

577 European Research Council under the European Unions Seventh Framework  
578 Programme (FP/20072013)/ERC Grant Agreement number 311092.

579

## ACKNOWLEDGEMENTS

580 Calculations where done using the Imperial College London Cluster Services (doi:  
581 10.14469/hpc/2232). We thank Alberto Pascual Garcia for input in the design of the  
582 simulations protocol and Guillermo Herraiz Yebes for helping with the CD metric  
583 proof.

584

\*

585 References

586 Bhattacharyya, A. 1943. On a measure of divergence between two statistical populations  
587 defined by their probability distributions. Bulletin of the Calcutta Mathematical  
588 Society 35:99–109.

- 589 Bogdanowicz, D., K. Giaro, and B. Wróbel. 2012. TreeCmp: Comparison of trees in  
590 polynomial time. *Evolutionary Bioinformatics* 8:475–487.
- 591 Brazeau, M. D. 2011. Problematic character coding methods in morphology and their  
592 effects. *Biological Journal of the Linnean Society* 104:489–498.
- 593 Brazeau, M. D., T. Guillerme, and M. R. Smith. 2017. Morphological phylogenetic  
594 analysis with inapplicable data. *bioRxiv* .
- 595 Dávalos, L. M., P. M. Velazco, O. M. Warsi, P. D. Smits, and N. B. Simmons. 2014.  
596 Integrating incomplete fossils by isolating conflicting signal in saturated and  
597 non-independent morphological characters. *Systematic Biology* 63:582–600.
- 598 De Laet, J. 2015. Parsimony analysis of unaligned sequence data: maximization of  
599 homology and minimization of homoplasy, not minimization of operationally  
600 defined total cost or minimization of equally weighted transformations. *Cladistics*  
601 31:550–567.
- 602 Dobson, A. J. 1975. Comparing the shapes of trees vol. 452 of *Lecture Notes in*  
603 *Mathematics* Pages 95–100. Springer Berlin Heidelberg.
- 604 Dollo, L. 1893. Les lois de l'évolution. *Bull Soc Belge Geol Pal Hydr* Page 164166.
- 605 Douady, C., F. Delsuc, Y. Boucher, W. Doolittle, and E. Douzery. 2003. Comparison of  
606 bayesian and maximum likelihood bootstrap measures of phylogenetic reliability.  
607 *Molecular Biology and Evolution* 20:248–254.

- 608 Felsenstein, J. 1985. Phylogenies and the comparative method. *The American Naturalist*  
609 125:1–15.
- 610 Felsenstein, J. 2004. *Inferring phylogenies vol. 2*. Sinauer Associates Sunderland.
- 611 FitzJohn, R. G. 2012. Diversitree: comparative phylogenetic analyses of diversification  
612 in *R. Methods in Ecology and Evolution* 3:1084–1092.
- 613 FitzJohn, R. G., M. W. Pennell, A. E. Zanne, P. F. Stevens, D. C. Tank, and W. K.  
614 Cornwell. 2014. How much of the world is woody? *Journal of Ecology* 102:1266–1272.
- 615 Goloboff, P. A., A. T. Galvis, J. S. Arias, and A. Smith. 2018. Parsimony and modelbased  
616 phylogenetic methods for morphological data: comments on o’reilly etal.  
617 *Palaeontology* 0.
- 618 Goloboff, P. A., A. Torres, and J. S. Arias. 2017. Weighted parsimony outperforms other  
619 methods of phylogenetic inference under models appropriate for morphology.  
620 *Cladistics* .
- 621 Goswami, A. and P. David Polly. 2010. The influence of character correlations of  
622 phylogenetic analyses: a case study of the carnivoran cranium. Pages 141–164 *in*  
623 *Carnivoran Evolution: New Views on Phylogeny, Form, and Function*. (A. Goswami  
624 and A. Friscia, eds.). Cambridge University Press, Cambridge.
- 625 Goswami, A. and C. Janis. 2006. Morphological integration in the carnivoran skull.  
626 *Evolution* 60:169–183.

- 627 Goswami, A., J. Smaers, C. Soligo, and P. Polly. 2014. The macroevolutionary  
628 consequences of phenotypic integration: from development to deep time. *Phil. Trans.*  
629 *R. Soc. B* 369:20130254.
- 630 Gower, J. C. 1971. A general coefficient of similarity and some of its properties.  
631 *Biometrics* 27:857–871.
- 632 Grabowski, M. and A. Porto. 2016. How many more? sample size determination in  
633 studies of morphological integration and evolvability. *Methods in Ecology and*  
634 *Evolution* Pages n/a–n/a.
- 635 Guillaume, T. 2016. *disprity: v0.2*.
- 636 Guillaume, T. and N. Cooper. 2016a. Assessment of available anatomical characters for  
637 linking living mammals to fossil taxa in phylogenetic analyses. *Biology letters*  
638 12:20151003.
- 639 Guillaume, T. and N. Cooper. 2016b. Effects of missing data on topological inference  
640 using a total evidence approach. *Molecular Phylogenetics and Evolution* 94, Part  
641 A:146 – 158.
- 642 Hasegawa, M., H. Kishino, and T. A. Yano. 1985. Dating of the human ape splitting by a  
643 molecular clock of mitochondrial-DNA. *Journal of Molecular Evolution* 22:160–174.
- 644 Heath, T. A., J. P. Huelsenbeck, and T. Stadler. 2014. The fossilized birth–death process  
645 for coherent calibration of divergence-time estimates. *Proceedings of the National*  
646 *Academy of Sciences* 111:E2957–E2966.

647 Hollander, M., D. A. Wolfe, and E. Chicken. 2013. Nonparametric statistical methods.

648 John Wiley & Sons.

649 Holm, S. 1979. A simple sequentially rejective multiple test procedure. Scandinavian

650 journal of statistics Pages 65–70.

651 ICHPC. 2011. Imperial college high performance computing service. [http://www.](http://www.imperial.ac.uk/admin-services/ict/self-service/research-support/hpc/)

652 [imperial.ac.uk/admin-services/ict/self-service/research-support/hpc/](http://www.imperial.ac.uk/admin-services/ict/self-service/research-support/hpc/).

653 Joysey, K. A. and A. E. Friday. 1982. Problems of phylogenetic reconstruction. London

654 etc.: [Systematics Assn. Spec. vol. No. 21.] Academic Press 576:561.

655 Kelly, E. M. and K. E. Sears. 2010. Reduced phenotypic covariation in marsupial limbs

656 and the implications for mammalian evolution. Biological Journal of the Linnean

657 Society 102:22–36.

658 Lewis, P. 2001. A likelihood approach to estimating phylogeny from discrete

659 morphological character data. Systematic Biology 50:913–925.

660 Maddison, W. P. 1990. A method for testing the correlated evolution of two binary

661 characters: Are gains or losses concentrated on certain branches of a phylogenetic

662 tree? Evolution 44:539–557.

663 Mark Pagel, A. E. B. J. C. E. J. B. L., Andrew Meade. 2006. Bayesian analysis of

664 correlated evolution of discrete characters by reversiblejump markov chain monte

665 carlo. The American Naturalist 167:808–825.



- 666 Ni, X., D. Gebo, M. Dagosto, J. Meng, P. Tafforeau, J. Flynn, and K. Beard. 2013. The  
667 oldest known primate skeleton and early haplorhine evolution. *Nature* 498:60–64.
- 668 O’Leary, M. A., J. I. Bloch, J. J. Flynn, T. J. Gaudin, A. Giallombardo, N. P. Giannini, S. L.  
669 Goldberg, B. P. Kraatz, Z.-X. Luo, J. Meng, X. Ni, M. J. Novacek, F. A. Perini, Z. S.  
670 Randall, G. W. Rougier, E. J. Sargis, M. T. Silcox, N. B. Simmons, M. Spaulding, P. M.  
671 Velazco, M. Weksler, J. R. Wible, and A. L. Cirranello. 2013. The placental mammal  
672 ancestor and the post-K-Pg radiation of placentals. *Science* 339:662–667.
- 673 O’Reilly, J. E., M. N. Puttick, L. Parry, A. R. Tanner, J. E. Tarver, J. Fleming, D. Pisani,  
674 and P. C. J. Donoghue. 2016. Bayesian methods outperform parsimony but at the  
675 expense of precision in the estimation of phylogeny from discrete morphological  
676 data. *Biology Letters* 12.
- 677 O’Reilly, J. E., M. N. Puttick, D. Pisani, P. C. J. Donoghue, and A. Smith. 2018. Empirical  
678 realism of simulated data is more important than the model used to generate it: a  
679 reply to goloboff etal. *Palaeontology* 0.
- 680 O’Reilly, J. E. and P. C. Donoghue. 2017. The efficacy of consensus tree methods for  
681 summarising phylogenetic relationships from a posterior sample of trees estimated  
682 from morphological data. *Systematic biology* .
- 683 Pagel, M. 1994. Detecting correlated evolution on phylogenies: A general method for  
684 the comparative analysis of discrete characters. *Proceedings of the Royal Society of  
685 London B: Biological Sciences* 255:37–45.

- 686 Puttick, M. N., J. E. O'Reilly, A. R. Tanner, J. F. Fleming, J. Clark, L. Holloway,  
687 J. Lozano-Fernandez, L. A. Parry, J. E. Tarver, D. Pisani, et al. 2017. Uncertain-tree:  
688 discriminating among competing approaches to the phylogenetic analysis of  
689 phenotype data. *Proceedings of the Royal Society B* 284:20162290.
- 690 Robinson, D. F. and L. R. Foulds. 1981. Comparison of phylogenetic trees. *Mathematical*  
691 *Biosciences* 53:131–147.
- 692 Ronquist, F., M. Teslenko, P. van der Mark, D. L. Ayres, A. Darling, S. Hohna, B. Larget,  
693 L. Liu, M. A. Suchard, and J. P. Huelsenbeck. 2012. MrBayes 3.2: efficient Bayesian  
694 phylogenetic inference and model choice across a large model space. *Systematic*  
695 *Biology* 61:539–42.
- 696 Russell Lande, S. J. A. 1983. The measurement of selection on correlated characters.  
697 *Evolution* 37:1210–1226.
- 698 Simões, T. R., M. W. Caldwell, A. Palci, and R. L. Nydam. 2017. Giant taxon-character  
699 matrices: quality of character constructions remains critical regardless of size.  
700 *Cladistics* 33:198–219.
- 701 Soto, D. X., J. Benito, E. Gacia, E. García-Berthou, and J. Catalan. 2016. Trace metal  
702 accumulation as complementary dietary information for the isotopic analysis of  
703 complex food webs. *Methods in Ecology and Evolution* 7:910–918.
- 704 Spencer, M. R. and E. W. Wilberg. 2013. Efficacy or convenience? Model-based

705 approaches to phylogeny estimation using morphological data. *Cladistics* 29:663–671.

706

707 Stoessel, A., B. M. Kilbourne, and M. S. Fischer. 2013. Morphological integration versus  
708 ecological plasticity in the avian pelvic limb skeleton. *Journal of Morphology*

709 274:483–495.

710 Swofford, D. L. 2001. Paup\*: Phylogenetic analysis using parsimony (and other  
711 methods) 4.0. b5 .

712 Wilkinson, M. 1995. Coping with abundant missing entries in phylogenetic inference  
713 using parsimony. *Syst. Biol.* 44:501–514.

714 Wright, A. M. and D. M. Hillis. 2014. Bayesian analysis using a simple Likelihood  
715 model outperforms parsimony for estimation of phylogeny from discrete  
716 morphological data. *PLoS ONE* 9:e109210.

717 Wright, A. M., G. T. Lloyd, and D. M. Hillis. 2016. Modeling character change  
718 heterogeneity in phylogenetic analyses of morphology through the use of priors.  
719 *Systematic Biology* 65:602–611.

720 Wright, A. M., K. M. Lyons, M. C. Brandley, and D. M. Hillis. 2015. Which came first:  
721 the lizard or the egg? robustness in phylogenetic reconstruction of ancestral states.  
722 *Journal of Experimental Zoology Part B: Molecular and Developmental Evolution*  
723 324:504–516.

724 Zou, Z. and J. Zhang. 2016. Morphological and molecular convergences in mammalian  
725 phylogenetics. *Nature Communications* 7:12758 EP –.
